# Supplementary material
Source: publisher site journal article supplement (https://www.spandidos-publications.com/8082/downloadSupplementary)
Supplement: Supplementary file 1 [file downloadSupplementary]

## Sheet: 附表4
Table SIV. Gene set variation analysis of disulfidptosis pathway activity in cholangiocarcinoma subtypes.
Tag	ICC001G	ICC002G	ICC003G	ICC005G	ICC006G	ICC008G	ICC009G	ICC011G	ICC012G	ICC013G	ICC015G	ICC016G	ICC018G	ICC019G	ICC020G	ICC021G	ICC022G	ICC023G	ICC024G	ICC027G	ICC028G	ICC031G	ICC034G	ICC037G	ICC039G	ICC040G	ICC041G	ICC044G	ICC046G	ICC047G	ICC049G	ICC051G	ICC052G	ICC053G	ICC055G	ICC056G	ICC057G	ICC058G	ICC059G	ICC061G	ICC063G	ICC064G	ICC065G	ICC067G	ICC068G	ICC071G	ICC072G	ICC073G	ICC074G
Disulfidptosis	-0.0465331	0.0408411	0.0618467	-0.265639	0.0707576	0.0988356	-0.186461	0.0224258	0.187434	-0.0379087	0.206504	0.024606	0.199526	-0.178337	-0.246819	0.234599	-0.0551332	0.173972	-0.249631	-0.310654	-0.0577156	0.181478	-0.408568	0.249218	0.447597	-0.240217	-0.09888	0.185269	0.299976	-0.0449553	-0.11095	-0.244199	0.0602611	-0.364077	-0.375933	0.16643	-0.103385	-0.238946	0.00219174	0.18964	0.0192714	-0.176488	-0.262774	-0.21853	0.130884	0.191956	0.159242	-0.236773	0.0246457
[truncated: 26 more columns]
